# Supplementary material
Source: PubMed Central journal article supplement (PMC8120441)
Supplement: jamaoncol-e211254-s001.pdf [file jamaoncol-e211254-s001.pdf]

## Supplemental Online Content

Cho B, Han Y, Lian M, et al. Evaluation of racial/ethnic differences in treatment and mortality among patients with triple-negative breast cancer. *JAMA Oncol*. Published online May 13, 2021. doi:10.1001/jamaoncol.2021.1254

**eTable.** Characteristics of non-Hispanic African American women and non-Hispanic European American women with triple-negative breast cancer in the Surveillance, Epidemiology, and End Results, 2010-2015 (n = 23,213)

This supplemental material has been provided by the authors to give readers additional information about their work.

eTable. Characteristics of non-Hispanic African American women and non-Hispanic European American women with triple-negative breast cancer in the Surveillance, Epidemiology, and End Results, 2010-2015 (n = 23,213)

|                                                   | AA (n = 5,881)<br>% | EA (n = 17,332)<br>% |
|---------------------------------------------------|---------------------|----------------------|
| Age at diagnosis, y                               |                     |                      |
| Mean (standard deviation)                         | 56.3 (12.8)         | 59.7 (14.1)          |
| 18–39                                             | 9.3                 | 7.5                  |
| 40–44                                             | 8.5                 | 7.5                  |
| 45–49                                             | 12.4                | 9.7                  |
| 50–54                                             | 16.4                | 12.4                 |
| 55–59                                             | 15.0                | 12.8                 |
| 60–64                                             | 13.4                | 13.5                 |
| 65–69                                             | 9.5                 | 12.0                 |
| 70–74                                             | 6.5                 | 9.1                  |
| ≥75                                               | 9.0                 | 15.6                 |
| Health insurance                                  |                     |                      |
| Uninsured                                         | 3.7                 | 1.4                  |
| Medicaid                                          | 20.6                | 8.8                  |
| Non-Medicaid insurance                            | 74.4                | 88.5                 |
| Unknown                                           | 1.3                 | 1.4                  |
| County-level socioeconomic deprivation, quartiles |                     |                      |
| 1 (least)                                         | 47.8                | 67.1                 |
| 2                                                 | 17.9                | 13.5                 |
| 3                                                 | 19.6                | 12.4                 |
| 4 (most)                                          | 14.7                | 7.1                  |
| Rural residency                                   | 7.9                 | 13.8                 |
| Cancer stage                                      |                     |                      |
| I                                                 | 30.0                | 38.5                 |
| II                                                | 49.7                | 46.3                 |
| III                                               | 20.3                | 15.2                 |
| Tumor size                                        |                     |                      |
| ≤2cm                                              | 38.6                | 47.1                 |
| >2cm–≤5cm                                         | 45.9                | 42.1                 |
| >5cm                                              | 14.3                | 9.6                  |
| Unknown                                           | 1.2                 | 1.3                  |
| Lymph node status                                 |                     |                      |
| Negative                                          | 60.9                | 68.3                 |
| 1-3 Positive                                      | 26.7                | 22.3                 |
| >3 Positive                                       | 12.3                | 9.3                  |
| Unknown                                           | 0.1                 | 0.1                  |
| Tumor grade                                       |                     |                      |
| Well differentiation                              | 1.3                 | 2.3                  |
| Intermediate differentiation                      | 13.0                | 17.8                 |
| Poor differentiation/undifferentiation            | 81.5                | 76.0                 |
| Unknown                                           | 4.2                 | 3.9                  |

Abbreviations: EA, European American; AA, African American. All *P* values <.0001
